# Supplementary material for: The analysis of azocyclotin and cyhexatin residues in fruits using ultrahigh-performance liquid chromatography-tandem mass spectrometry
Source: Royal Society of Chemistry journal article supplement (doi:10.1039/c4ay02624a), 2015-01-01

# The analysis of azocyclotin and cyhexatin residues in fruits using ultrahigh - performance liquid chromatography - tandem mass spectrometry

You-Ning Ma, Wen-Jun Gui, Guo-Nian Zhu

Institute of Pesticide and Environmental Toxicology, Zhejiang University, Hangzhou 310029, PR China

Corresponding Author:

Name: Dr. Guonian Zhu

Address: Institute of Pesticide and Environmental Toxicology, Zhejiang University,

Hangzhou, 310029, PR China.

Phone/fax: +86 571 88982517

E-mail: zhugn@zju.edu.cn

**Keywords:** Ultrahigh-performance liquid chromatography-tandem mass spectrometry (UHPLC-MS/MS);

Azocyclotin; Cyhexatin; Fruits; Residue analysis.

Fig.S1. Positive ion mass spectra of azocyclotin and cyhexatin in mass full scan mode;

Note: Azocyclotin yield an ion-source fragment in the selected conditions giving the  $[M-C_2H_2N_3]^+$  ( $m/z$  369.54) as the base peak ion when the cone voltage was 30V, the same as the protonated molecule  $[M+H]^+$  of cyhexatin. The transition  $m/z$  corresponds to cleavage of a triazole group.

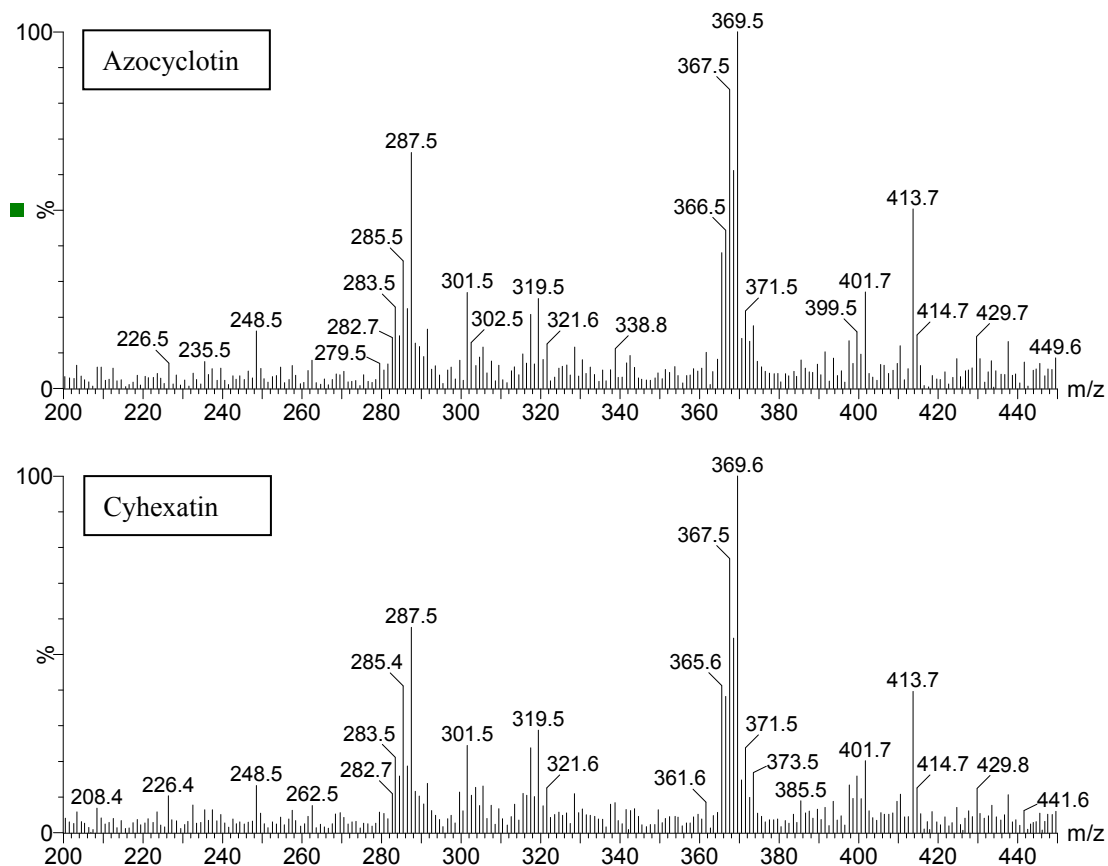

Supplement: c4ay02624a1.pdf [file c4ay02624a1.pdf]
